# Supplementary material for: Long-term Evaluation of Photo Activated Chromophore for Keratitis-Corneal Cross-linking (PACK-CXL)
Source: Research Square preprint supplement (doi:10.21203/rs.3.rs-8253939/v1), 2025-12-22
Supplement: Supplementary file 1 [file a69031fbd604e7ad93f61c2a.xlsx]

## Sheet: Blad1
	Eye 1	Eye 2	Eye 3	Eye 4	Eye 5	Eye 6	Eye 7	Eye 8	Eye 9	Eye 10	Eye 11	Eye 12	Eye 13
Sex	male	female	female	female	female	female	male	male	male	female	male	male	male
Previous transplant	no	no	no	no	no	no	yes	no	no	yes	no	yes, bilateral	yes, bilateral
Years until follow up	13	13	7	4	3	2	11	10	7	8	2	5	5
Visual acuity at folllow up	84 EDTRS, Snellen 1.0	85 EDTRS, Snellen 1.0	85 EDTRS Snellen 1.0	51 EDTRS, Snellen 0.2	79 EDTRS, Snellen 0.8 with contact lens or 70 EDTRS, Snellen 0.5 with glasses +2.5-2.0/15	83 EDTRS, Snellen 1.0	Counting Fingers 30cm	85 EDTRS, Snellen 1.0	85 EDTRS, Snellen 1.0	62 EDTRS, Snellen 0.31	Lea symbols in 3m, 0.06 with glasses	Hand Motion	70 EDTRS or Snellen 0.4 (+4,75-7,75/58)
Tomography at follow up	K-max 45.1 dpt, regular astigm of 1.5dpt, normal pachymetric map	K-max 45.6dpt, slightly irregular astigm of 0.9 dpt, reg. pachymetric map	K-max 47.5dpt, regular astigmatism of 1.8dpt, non concentric rings in pachymetric map, thinest area strechting even paracentrally temporally and medially	K-max 52.7 dpt, irreg. astigm of 2.2dpt, pachymetric thinning centrally to 319µm	K-max 60.9dpt, irreg. astigm. 9.8dpt, thinning superiorly with scarring to 370µm	K-max 43.8dpt, irreg. astigm. of 1.2dpt, norm thickness, no irreg in pachymetric map	K-max 103.6dpt, astigmatism 35.5dpt, extremely thickened and decompensated to 3237µm	K-max 47dpt, reg astigm of 2.8dpt, normal thickness map	K-max 43.5 dpt, astigmatism of 0.5 dpt, regular surface, normal thickness map	bad quality, blinking, irreg astigm, general thickening with a thinner region vertically towards the limbus	bad quality with flickering eyeball, irregular cornea, thickening to 1048µm centrally,	not possible	K-max 49 dpt, irreg astigm of 8.4 dpt, general thickening towards edges to max 1135µm inferior nasally and thinnest with 537µm paracentrally superior temporally
Endothelial cell count at follow up (other eye)	2304 (2294)	2315 (2370)	2950 (2976)	not possible	2336 (2660)	3040 (3067)	not possible	2907 (3077)	2532 (2494)	1724 can't comprehend all cells, big blotches as group (2660 )	not possible	not possible	2703
Status at follow up	subepithelial fibrosis, discrete vascularisation, no stromal haziness	thin subepithelial fibrosis, no fluorescein uptake	1.6x1.5mm subepithelial scarring with stria formation on medial border, less scarring in adjacent area, discrete vascularisation, BUT 4s on top of scarring	central thinning, 7x6mm stromal haziness accentuated anteriorally, thin vascularisation circumferentially in all depths, moving erytrocytes visible, no fluorescence uptake, no lipid deposition, pigment on anterior lens plane	4x7mm triangular formed subepithelial and stromal scarring, thinning in same area, discrete superficial vascularisation	pannusformation and vascularisation superiorly and at 8 o'clock, fluorescein uptake in same area, no scarring, BUT 3s	extremely hazy to white recipient cornea, well adapted transplant, but edematous and thickend, inferior 3x5mm stromal scarring, superficial vascularisation	1x1mm scarring in superficial stroma, smaller scarr beside and at 10 o'klock, endothelial irregularity under, irregular tear film, breaking upp immediatly	1.2x1.1mm geographic scarring, no fluorescent uptake, BUT 3s	status after pkp, superficial thin vascularisation, 2.8x3mm stromal scarring ärrbildning, even on the endothelium, thinning, fold in transplant	deep and superficial vascularisation to the center of the inferior hemisphere, 4x5mm central scarring and stromal haziness, depositions in upper hemisphere	decompensated and thickened, opaque, vascularised, irregular and hypertrofic epithelium, dry dye uptake in several places	wide transplant close to limbus, scarring circumferential, suture remnants, superficial vascularisation, cystlike thinning towards the edge at 5 o'clock, iris tilting upwards towards thinning, dry epithelium, hypertrofic and irregular epithelium inferiorally, BUT 7s
